# Supplementary material for: Long-read sequencing uncovers a complex transcriptome topology in varicella zoster virus
Source: PubMed Central journal article supplement (PMC6280550; doi:10.1186/s12864-018-5267-8), 2018-12-04

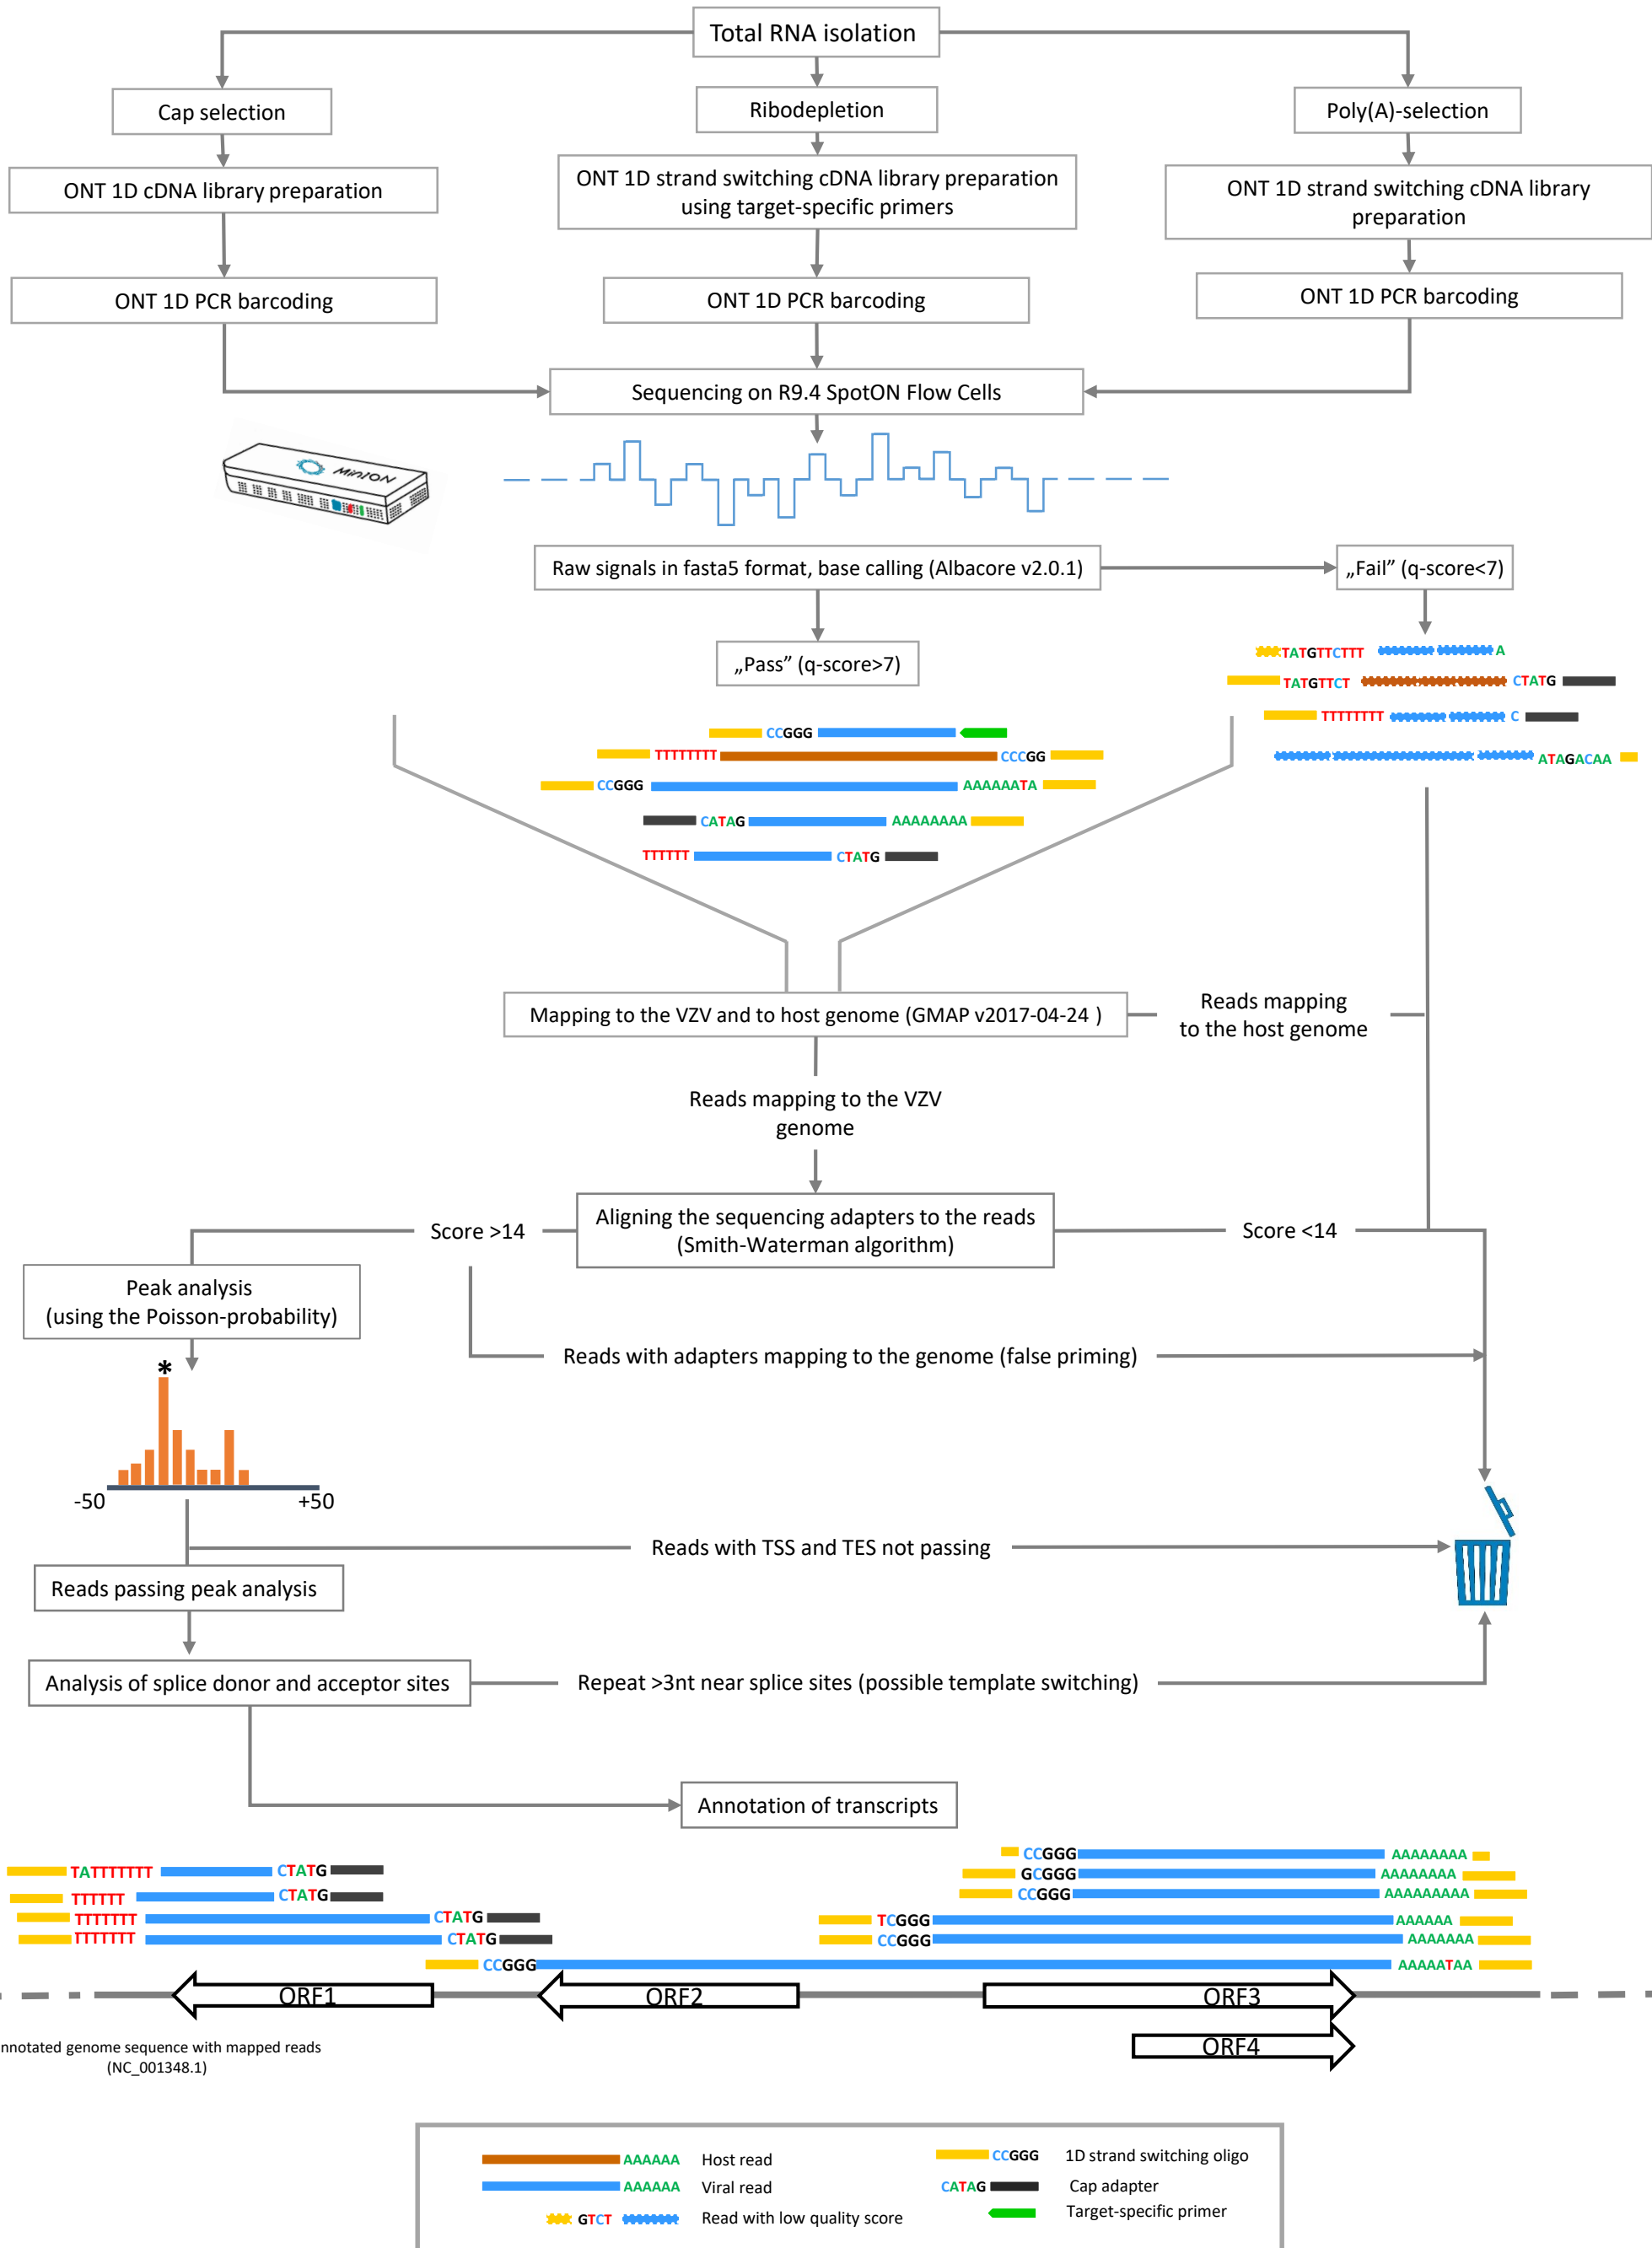

Supplement: 12864_2018_5267_MOESM1_ESM.pdf [file 12864_2018_5267_MOESM1_ESM.pdf]
